# Supplementary material for: Ultrafine Rh nanoparticle decorated MoSe2nanoflowers for efficient alkaline hydrogen evolution reaction
Source: Royal Society of Chemistry journal article supplement (doi:10.1039/c8qi00874d), 2018-01-01
Supplement: c8qi00874d1.pdf [file c8qi00874d1.pdf]

## Supporting Information

### Ultrafine Rh nanoparticles decorated MoSe<sub>2</sub> nanoflowers for efficient alkaline hydrogen evolution reaction

Yuanmeng Zhao<sup>a</sup>, Chenlu Yang<sup>a</sup>, Guixiang Mao<sup>a</sup>, Jun Su<sup>b</sup>, Gongzhen Cheng<sup>a</sup> and Wei Luo<sup>a\*</sup>

<sup>a</sup>College of Chemistry and Molecular Sciences, Wuhan University, Wuhan, Hubei, 430072, P.R. China, Tel.: +86-27-68752366.

\*Corresponding author. E-mail addresses: [wluo@whu.edu.cn](mailto:wluo@whu.edu.cn)

<sup>b</sup>Wuhan National Laboratory for Optoelectronics, Huazhong University of Science and Technology, Wuhan, Hubei, 430074, P.R. China

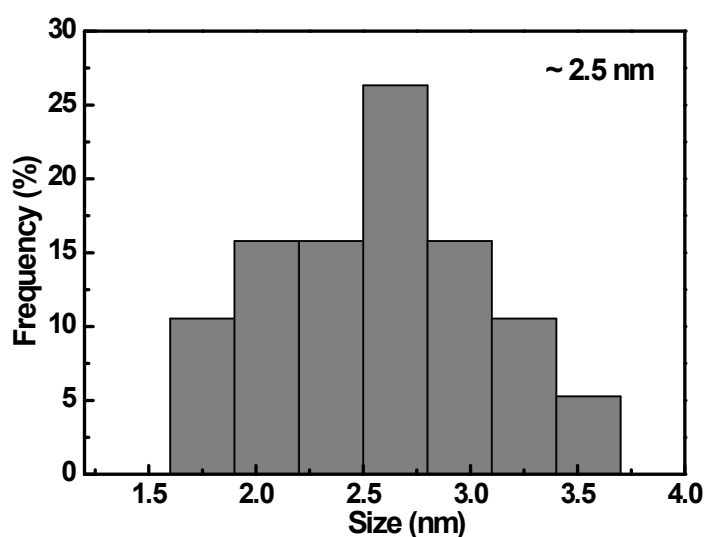

Fig. S1 The size distribution histogram of 8.2 wt% Rh-MoSe<sub>2</sub>.

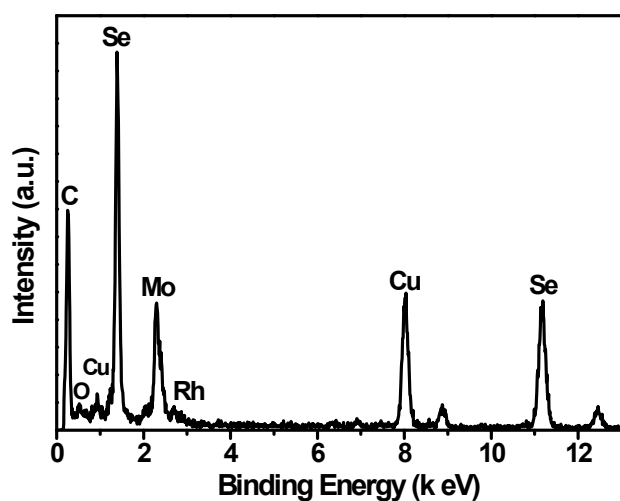

Fig. S2 The EDX spectrum of 8.2 wt% Rh-MoSe<sub>2</sub>.

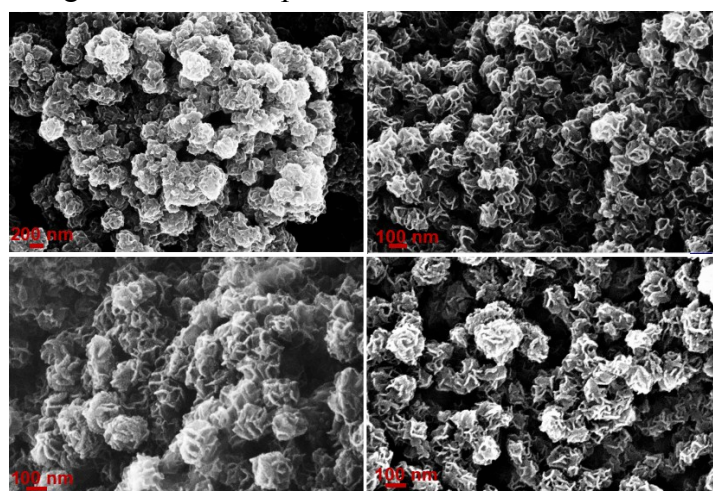

Fig. S3 SEM images of Rh-MoSe<sub>2</sub> with different contents of Rh: (a) pure MoSe<sub>2</sub>; (b) 2.9 wt%; (c) 8.2 wt% and (d) 12.6 wt% of Rh.

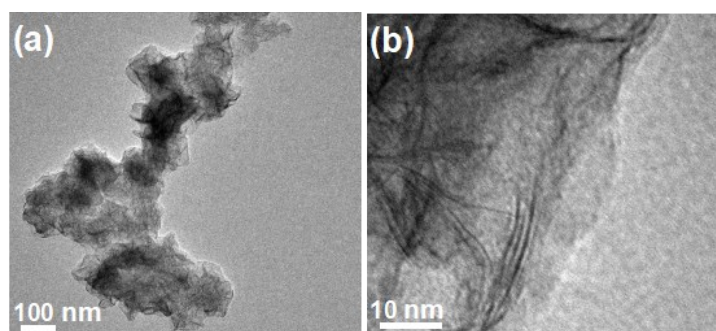

Fig. S4 TEM image of as-synthesized pure MoSe<sub>2</sub>.

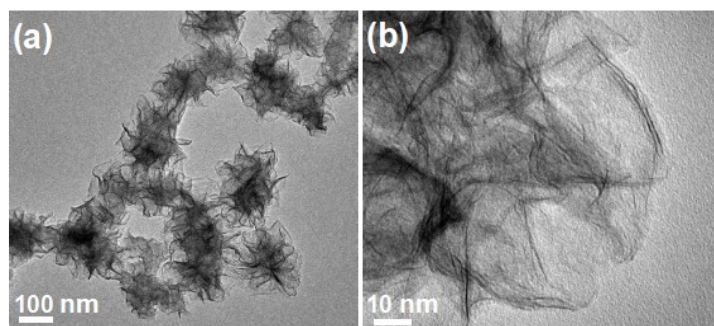

Fig. S5 TEM image of as-synthesized 2.9 wt% Rh-MoSe<sub>2</sub>.

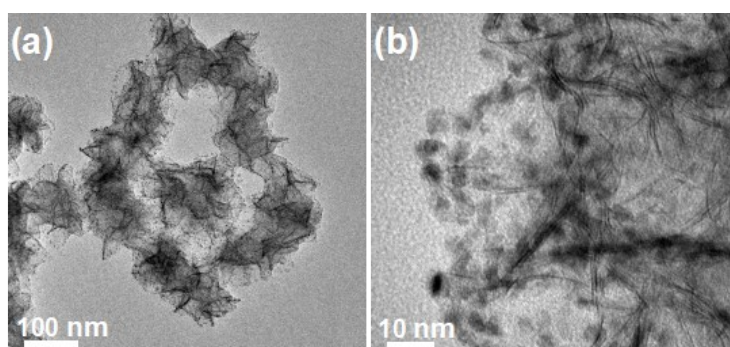

Fig. S6 TEM image of as-synthesized 12.6 wt% Rh-MoSe<sub>2</sub>.

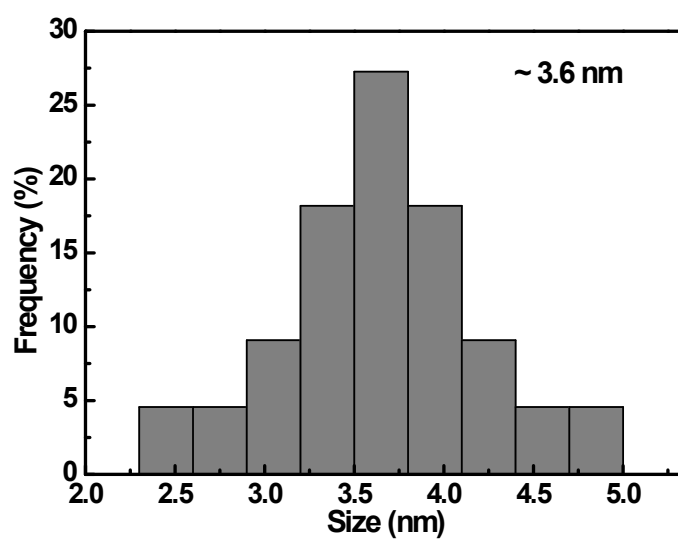

Fig. S7 The size distribution histogram of 12.6 wt% Rh-MoSe<sub>2</sub>.

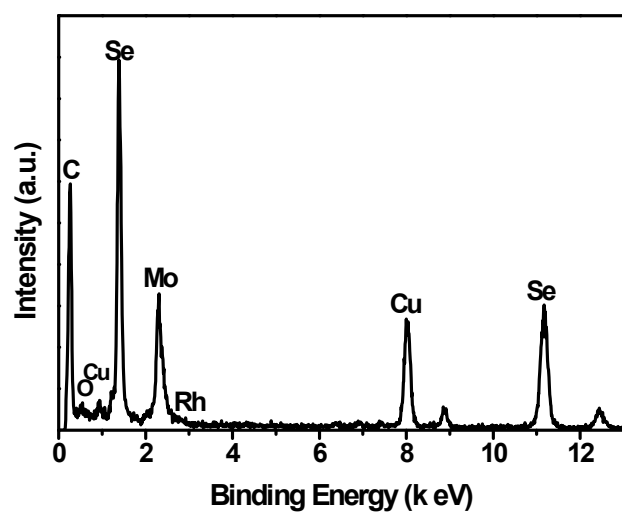

Fig. S8 The EDX spectrum of 2.9 wt% Rh-MoSe<sub>2</sub>.

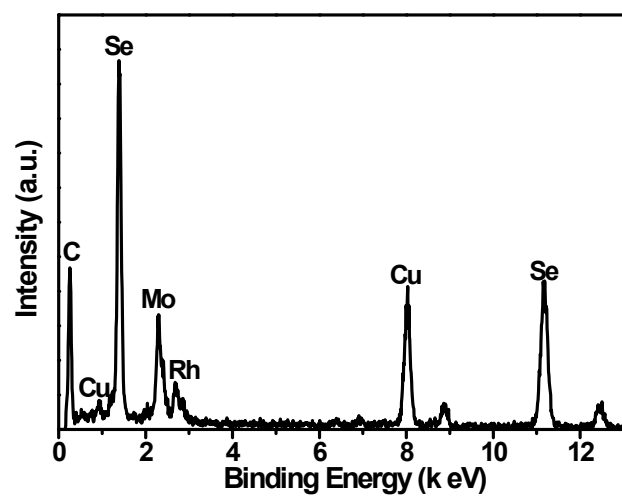

Fig. S9 The EDX spectrum of 12.6 wt% Rh-MoSe<sub>2</sub>.

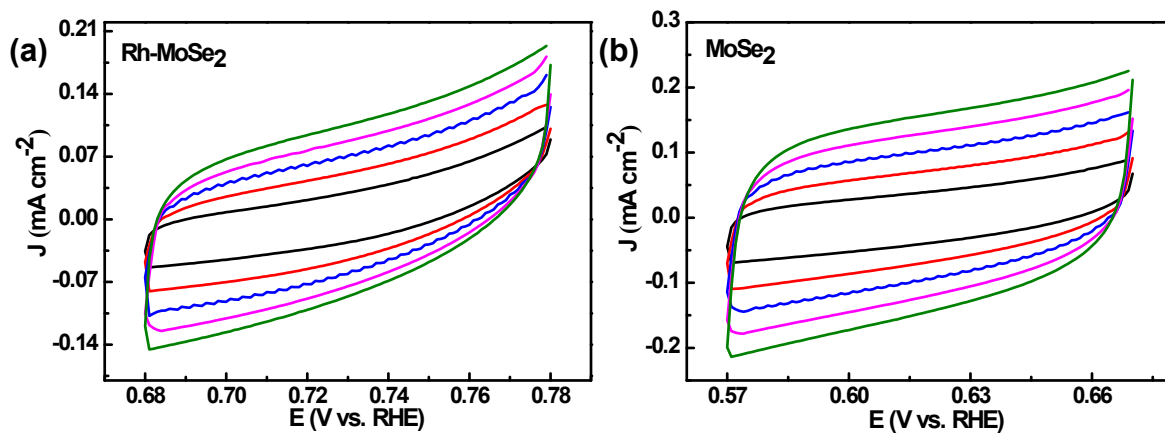

Fig. S10 Electrochemical double layer capacitance curves on wt% Rh-MoSe<sub>2</sub> (a) and MoSe<sub>2</sub> (b) with different scan rates from 50 mV s<sup>-1</sup> to 10 mV s<sup>-1</sup> in 1.0 M KOH.

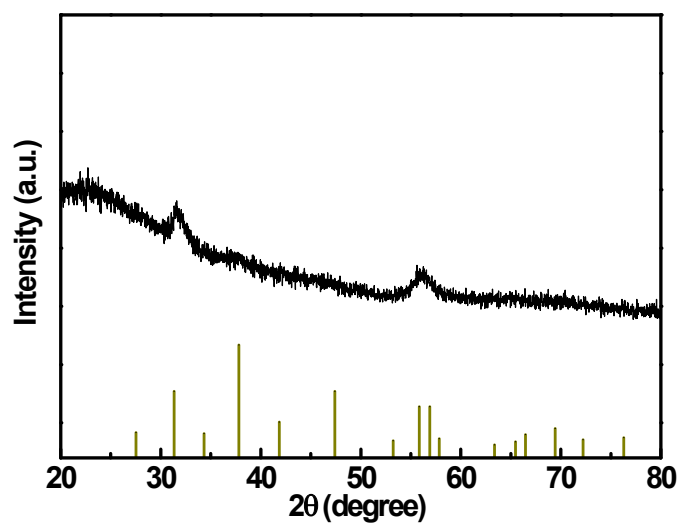

Fig. S11 XRD patterns of the 8.2 wt% Rh-MoSe<sub>2</sub> nanoflowers after chronopotentiometry test.

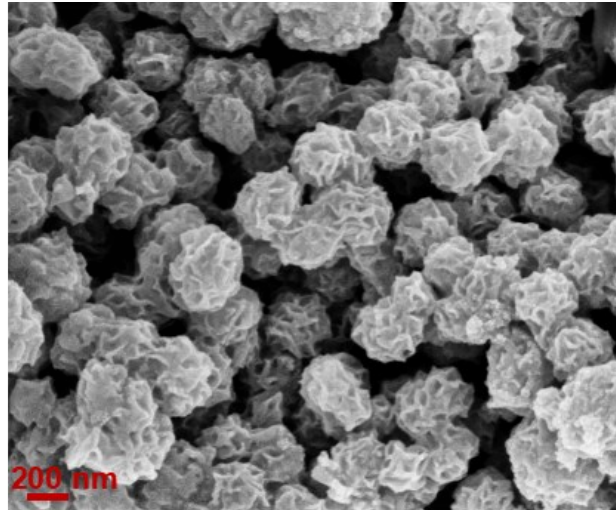

Fig. S12 SEM image of the 8.2 wt% Rh-MoSe<sub>2</sub> nanoflowers after chronopotentiometry test.

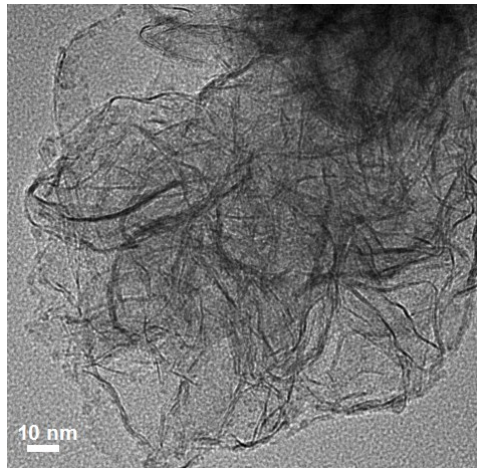

Fig. S13 TEM image of 8.2 wt% Rh-MoSe<sub>2</sub> nanoflowers after stability testing.

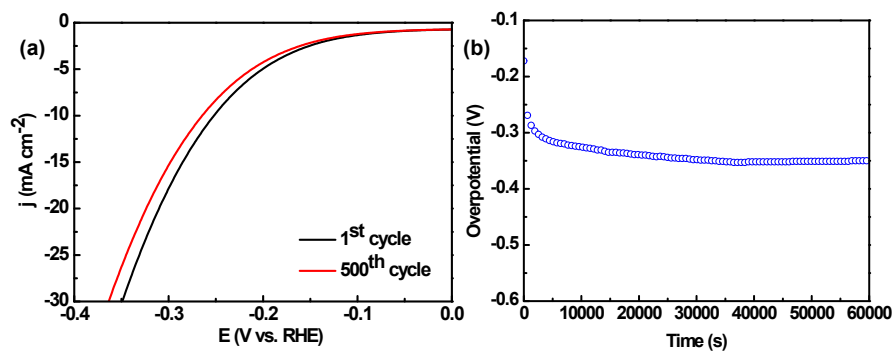

Fig. S14 (a) Polarization curves of MoSe<sub>2</sub> before and after 500 CV cycles. (b) Chronopotentiometric measurements of the HER at 10 mA cm<sup>-2</sup> using MoSe<sub>2</sub> as a catalyst.

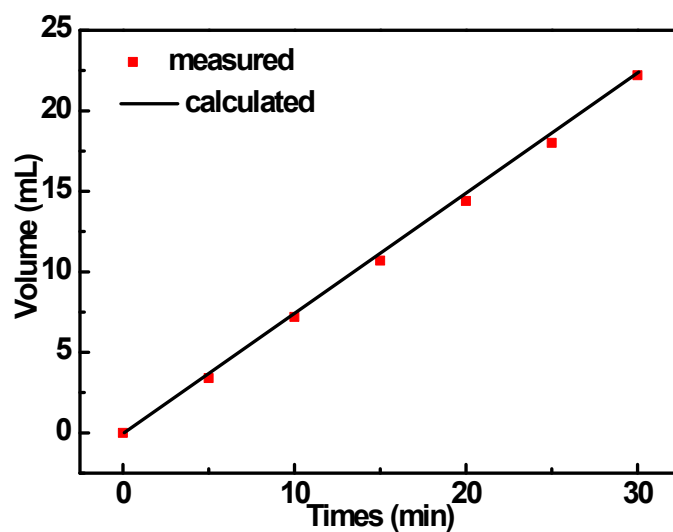

Fig. S13. The amount of hydrogen theoretically calculated and experimentally measured versus time for 8.2 wt% Rh-MoSe<sub>2</sub> in 1.0 M KOH.

Table S1. The raw material of Rh(acac)<sub>3</sub> and the corresponding contents of Rh in Rh-MoSe<sub>2</sub> nanoflowers.

| Raw material<br>Rh(acac) <sub>3</sub> (mg) | Rh content in Rh-MoSe <sub>2</sub><br>Rh (wt%) |
|--------------------------------------------|------------------------------------------------|
| 4                                          | 2.9                                            |
| 12                                         | 8.2                                            |
| 20                                         | 12.6                                           |

Table S2. Comparison of representative TMDs-based catalysts in 1.0 M KOH.

| Catalyst                                         | Substrate       | Loading<br>(mg cm <sup>-2</sup> ) | $\eta_{10}$ /(mV) | Reference |
|--------------------------------------------------|-----------------|-----------------------------------|-------------------|-----------|
| Rh-MoSe <sub>2</sub>                             | GCE             | 0.3                               | 73                | This work |
| CoSe <sub>2</sub> /MoSe <sub>2</sub>             | GCE             | 0.204                             | 218               | 1         |
| CS-MS/rGO-C                                      | GCE             | 0.57                              | 215               | 2         |
| MS-CS NTs                                        | GCE             | 0.57                              | 237               | 3         |
| Co-WSe <sub>2</sub> /MWNT                        | GCE             | 0.25                              | 241               | 4         |
| 2D-MoS <sub>2</sub> /Co(OH) <sub>2</sub>         | GCE             | ~0.285                            | 128               | 5         |
| Co <sub>9</sub> S <sub>8</sub> @MoS <sub>2</sub> | GCE             | ~0.4                              | 145               | 6         |
| MoS <sub>2</sub> /NiS                            | nickel<br>foam  | 4.9                               | 92                | 7         |
| MoWSe alloys                                     | GCE             | 1                                 | 262               | 8         |
| Ni(OH) <sub>2</sub> /MoS <sub>2</sub>            | Carbon<br>cloth | ~4.8                              | 80                | 9         |

|                                                                            |                 |       |     |    |
|----------------------------------------------------------------------------|-----------------|-------|-----|----|
| MoSe <sub>2</sub> @Ni <sub>0.85</sub> Se                                   | nickel<br>foam  | 6.48  | 117 | 10 |
| CoS/MoS <sub>2</sub>                                                       | GCE             | 0.18  | 214 | 11 |
| Co <sub>3</sub> S <sub>4</sub> /MoS <sub>2</sub> /Ni <sub>2</sub> P<br>NTs | GCE             | 0.18  | 178 | 11 |
| Ru/MoS <sub>2</sub>                                                        | Carbon<br>paper | 1.0   | 13  | 12 |
| MoS <sub>2</sub>  NiS MoO <sub>3</sub>                                     | Ti sheet        | 2     | 91  | 13 |
| MoS <sub>2</sub> -Ni <sub>3</sub> S <sub>2</sub><br>HNRS/NF                | Nickel<br>foam  | 13    | 98  | 14 |
| MoS <sub>2</sub> /Ni <sub>3</sub> S <sub>2</sub>                           | Nickel<br>foam  | 9.7   | 110 | 15 |
| Ni-MoS <sub>2</sub>                                                        | Carbon<br>cloth | 0.89  | 98  | 16 |
| MoS <sub>2</sub> @Ni/CC                                                    | Carbon<br>cloth | 4.0   | 91  | 17 |
| HF-MoSP                                                                    | GCE             | 0.35  | 119 | 18 |
| Co <sub>9</sub> S <sub>8</sub> @MoS <sub>2</sub> /CNFs                     | GCE             | 0.212 | 190 | 19 |

## References

- [1] G. Zhao, P. Li, K. Rui, Y. Chen, S. X. Dou and W. Sun, *Chem. Eur. J.*, 2018, **24**, 11158.
- [2] B. Wang, Z. Wang, X. Wang, B. Zheng, W. Zhang and Y. Chen, *J. Mater. Chem. A*, 2018, **6**, 12701.
- [3] X. Wang, B. Zheng, B. Yu, B. Wang, W. Hou, W. Zhang and Y. Chen, *J. Mater. Chem. A*, 2018, **6**, 7842.
- [4] G. Zhang, X. Zheng, Q. Xu, J. Zhang, W. Liu and J. Chen, *J. Mater. Chem. A*, 2018, **6**, 4793.
- [5] Z. Zhu, H. Yin, C. –T. He, M. Al-Mamun, P. Liu, L. Jiang, Y. Zhao, Y. Wang, H. –G. Yang, Z. Tang, D. Wang, X. –M. Chen and H. Zhao, *Adv. Mater.*, 2018, **30**, 1801171.



- [6] J. Bai, T. Meng, D. Guo, S. Wang, B. Mao and M. Cao, *ACS Appl. Mater. Interfaces*, 2018, **10**, 1678.
- [7] Z. Zhai, C. Li, L. Zhang, H. -C. Wu, L. Zhang, N. Tang, W. Wang and J. Gong, *J. Mater. Chem. A*, 2018, **6**, 9833.
- [8] O. E. Meiron, V. Kuraganti, I. Hod, R. Bar-Ziv and M. Bar-Sadan, *Nanoscale*, 2017, **9**, 13998.
- [9] B. Zhang, J. Liu, J. Wang, Y. Ruan, X. Ji, K. Xu, C. Chen, H. Wan, L. Miao and J. Jiang, *Nano Energy*, 2017, **37**, 74.
- [10] C. Wang, P. Zhang, J. Lei, W. Dong and J. Wang, *Electrochim. Acta*, 2017, **246**, 712.
- [11] H. Lin, H. Li, Y. Li, J. Liu, X. Wang and L. Wang, *J. Mater. Chem. A*, 2017, **5**, 25410.
- [12] J. Liu, Y. Zheng, D. Zhu, A. Vasileff, T. Ling and S. -Z. Qiao, *Nanoscale*, 2017, **9**, 16616.
- [13] C. Wang, B. Tian, M. Wu and J. Wang, *ACS Appl. Mater. Interfaces*, 2017, **9**, 7084.
- [14] Y. Yang, K. Zhang, H. Lin, X. Li, H. C. Chan, L. Yang and Q. Gao, *ACS Catal.*, 2017, **7**, 2357.
- [15] J. Zhang, T. Wang, D. Pohl, B. Rellinghaus, R. Dong, S. Liu, X. Zhuang and X. Feng, *Angew.Chem.Int. Ed.*, 2016, **55**, 6702.
- [16] J. Zhang, T. Wang, P. Liu, S. Liu, R. Dong, X. Zhuang, M. Chen and X. Feng, *Energy Environ. Sci.*, 2016, **9**, 2789.

- [17] Z. Xing, X. Yang, A. M. Asiri and X. Sun, *ACS Appl. Mater. Interfaces*, 2016, **8**, 14521.
- [18] A. Wu, C. Tian, H. Yan, Y. Jiao, Q. Yan, G. Yang and H. Fu, *Nanoscale*, 2016, **8**, 11052.
- [19] H. Zhu, J. Zhang, R. Yanzhang, M. Du, Q. Wang, G. Gao, J. Wu, G. Wu, M. Zhang, B. Liu, J. Yao and X. Zhang, *Adv. Mater.*, 2015, **27**, 4752.
